# Supplementary material for: 1,10-Secoguaianolides from Artemisia austro-yunnanensis and Their Anti-Inflammatory Effects
Source: PubMed Central journal article supplement (PMC6099792; doi:10.3390/molecules23071639), 2018-07-05
Supplement: molecules-23-01639-s001.pdf [file molecules-23-01639-s001.pdf]

**1,10-secoguaianolides from *Artemisia austro-yunnanensis* and their  
Anti-inflammatory effects**

Lan Liu, Weifeng Dai, Cheng Xiang, Jun Chi, Mi Zhang\*

Faculty of Life Science and Technology, Kunming University of Science and  
Technology, Kunming 650500, China

**Supporting Information**

Table S1 The Symbols and Definitions of Calculated Molecular Descriptors of Compounds **1-7**

Figures S1–7 1D and 2D NMR spectra in CDCl<sub>3</sub> and HRESIMS spectrum in CH<sub>3</sub>OH of **1**

Table S1. The Symbols and Definitions of Calculated Molecular Descriptors of Compounds 1-7

| Symbol     | Definition                                                                                |
|------------|-------------------------------------------------------------------------------------------|
| E3p        | 3rd component accessibility directional WHIM index / weighted by atomic polarizabilities  |
| L2m        | 2nd component size directional WHIM index / weighted by atomic masses                     |
| E_ang      | Angle bend potential energy.                                                              |
| ASPAN      | The average span R                                                                        |
| P3m        | 3rd component shape directional WHIM index / weighted by atomic masses                    |
| P3e        | 3rd component shape directional WHIM index / weighted by atomic electrotopological states |
| ASA        | Solvent-accessible surface areas                                                          |
| vsurf_D8   | Hydrophobic volume at -1.6                                                                |
| vsurf_DW12 | vsurf_EWmin1, vsurf_EWmin2 distance                                                       |
| vsurf_ID8  | Hydrophobic integy moment at -1.6                                                         |
| PM3_dipole | The dipole moment calculated using the PM3 Hamiltonian [MOPAC]                            |
| MORSEC21   | 3D-MoRSE - signal 21 / weighted by atomic charge                                          |
| MORSEC29   | 3D-MoRSE - signal 29 / weighted by atomic charge                                          |
| MORSEE4    | 3D-MoRSE - signal 04 / weighted by atomic Sanderson electronegativities                   |
| MORSEE27   | 3D-MoRSE - signal 27 / weighted by atomic Sanderson electronegativities                   |
| MORSEM16   | 3D-MoRSE - signal 16 / weighted by atomic masses                                          |
| MORSEM18   | 3D-MoRSE - signal 18 / weighted by atomic masses                                          |
| MORSEM10.1 | 3D-MoRSE - signal 10.1 / weighted by atomic masses                                        |
| MORSEM20.1 | 3D-MoRSE - signal 20.1 / weighted by atomic masses                                        |
| MORSEM22.1 | 3D-MoRSE - signal 22.1 / weighted by atomic masses                                        |
| MORSEN26   | 3D-MoRSE - signal 26 / weighted by atomic number                                          |
| MORSEU8    | 3D-MoRSE - signal 08 / unweighted                                                         |
| MORSEU22   | 3D-MoRSE - signal 22 / unweighted                                                         |
| MORSEV25   | 3D-MoRSE - signal 25 / weighted by atomic van der Waals volumes                           |
| MORSEV26   | 3D-MoRSE - signal 26 / weighted by atomic van der Waals volumes                           |
| RDFU10     | 3D-RDF - signal 10 / unweighted                                                           |
| RDFM13     | 3D-RDF - signal 13 / weighted by atomic masses                                            |

|        |                                                |
|--------|------------------------------------------------|
| RDFC20 | 3D-RDF - signal 20 / weighted by atomic charge |
| RDFC4  | 3D-RDF - signal 4 / weighted by atomic charge  |

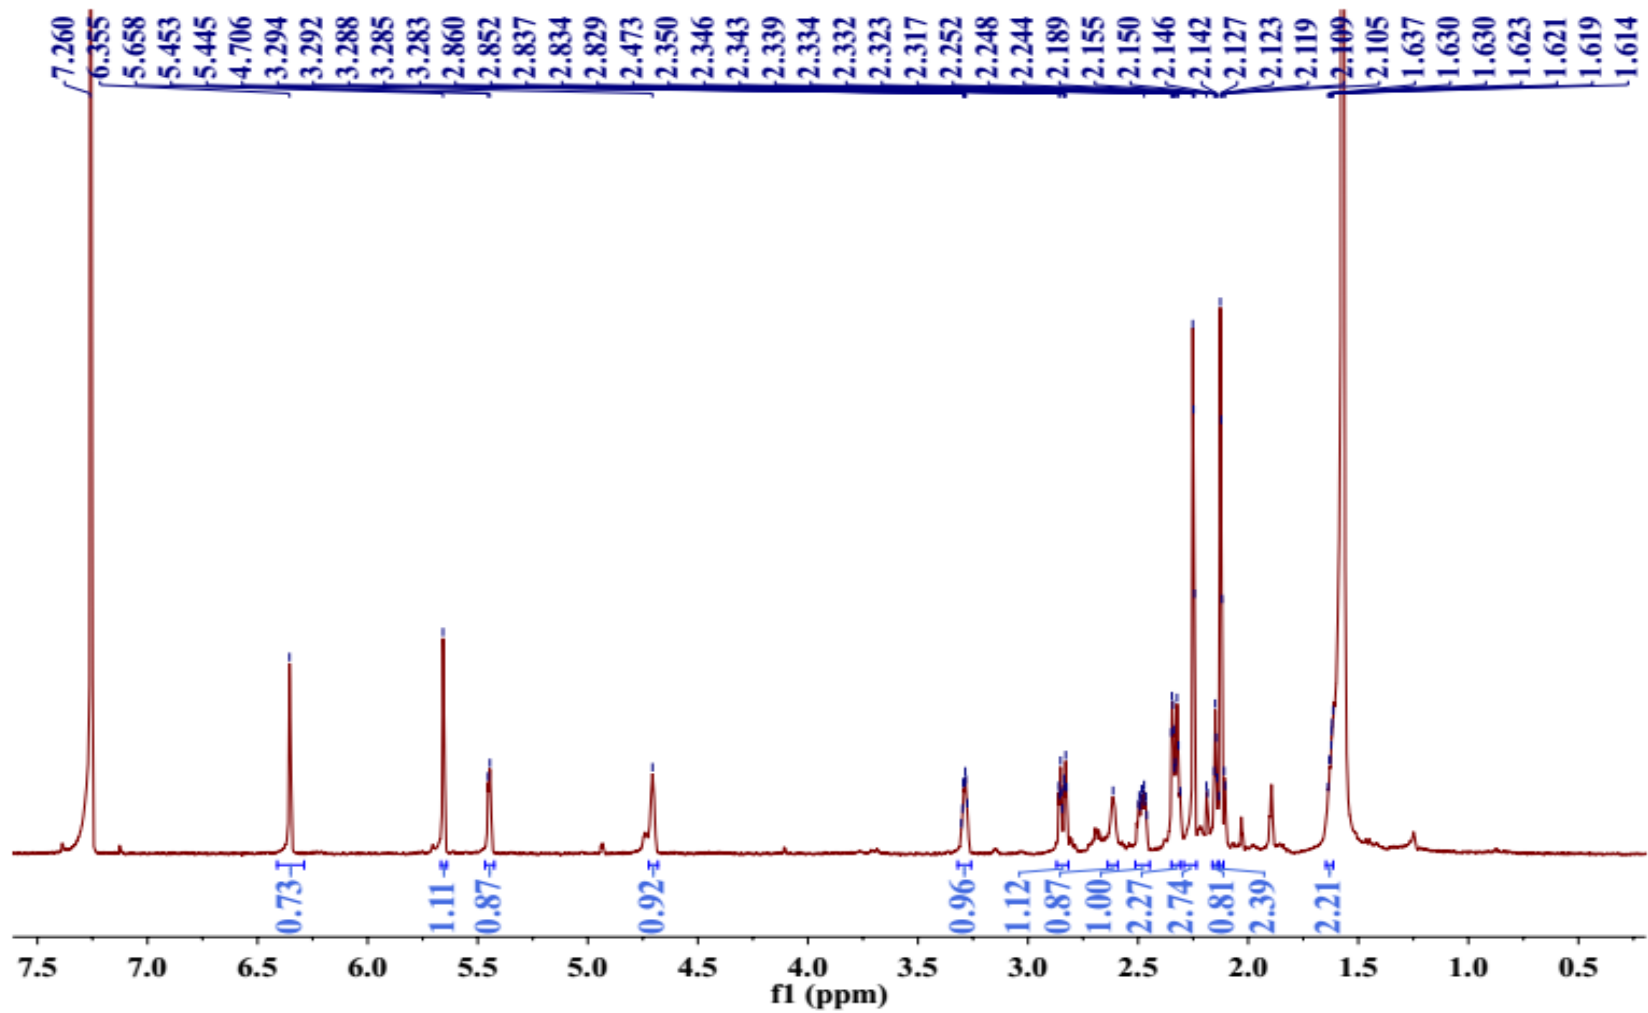

Figure S1 <sup>1</sup>H-NMR spectrum of compound 1 in CDCl<sub>3</sub>

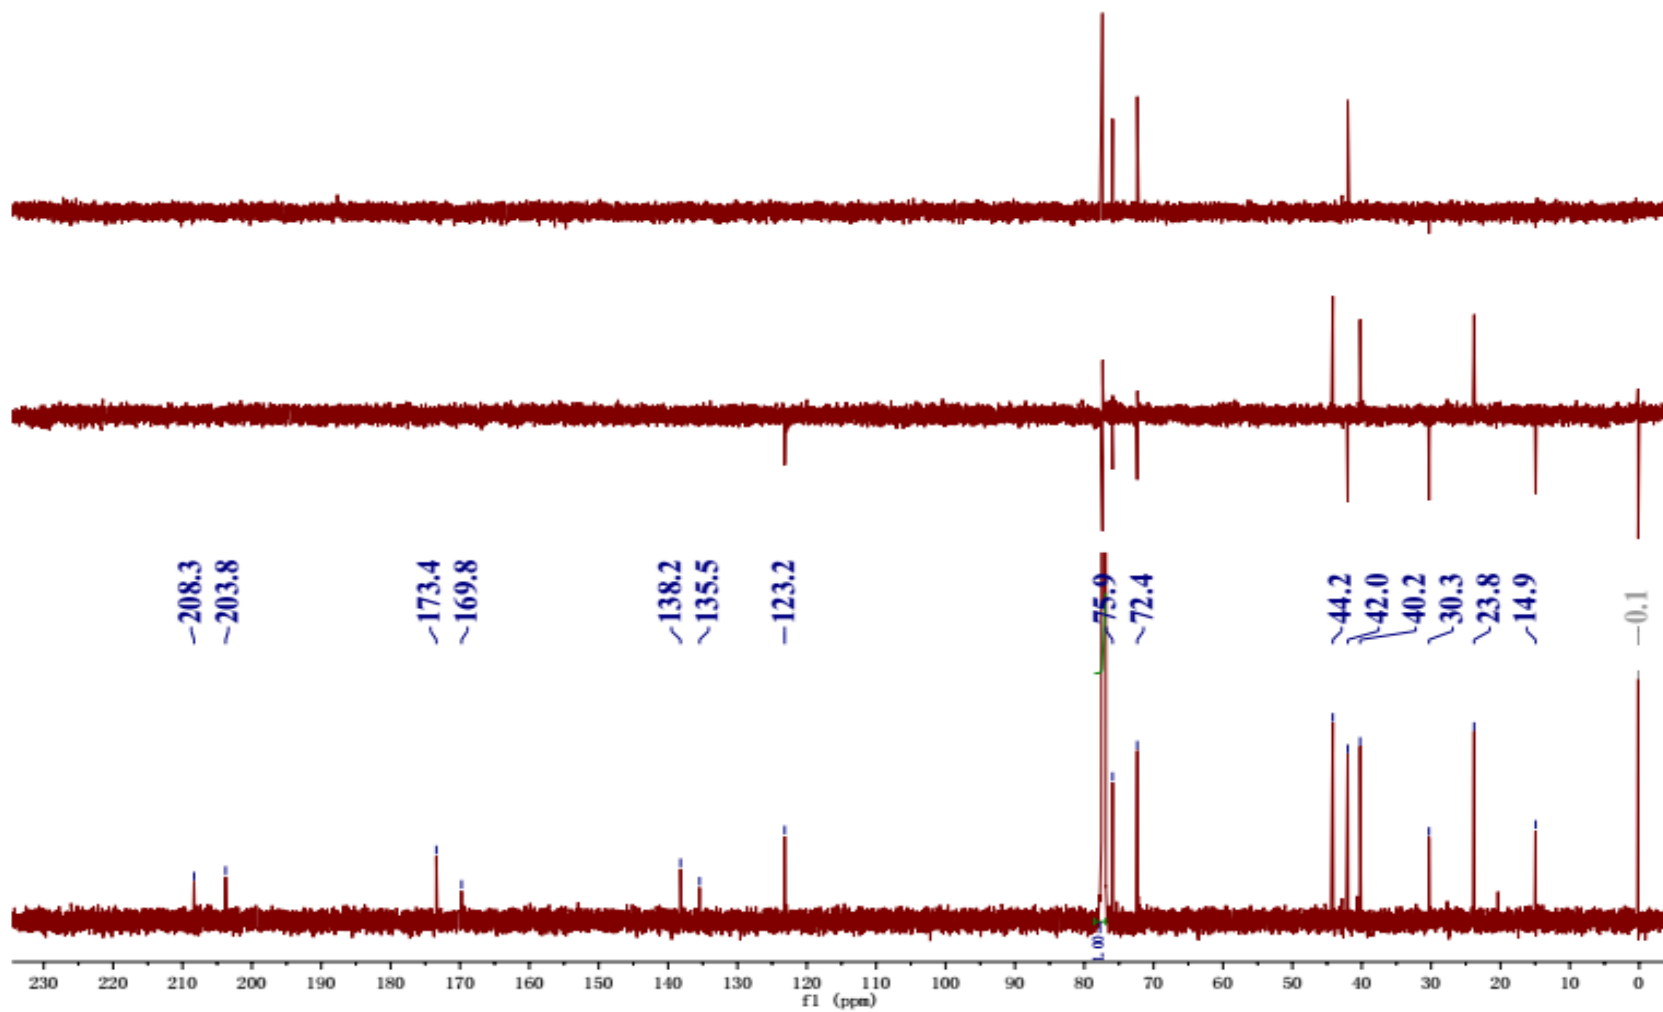

Figure S2 <sup>13</sup>C-NMR and DEPT spectra of compound 1 in CDCl<sub>3</sub>

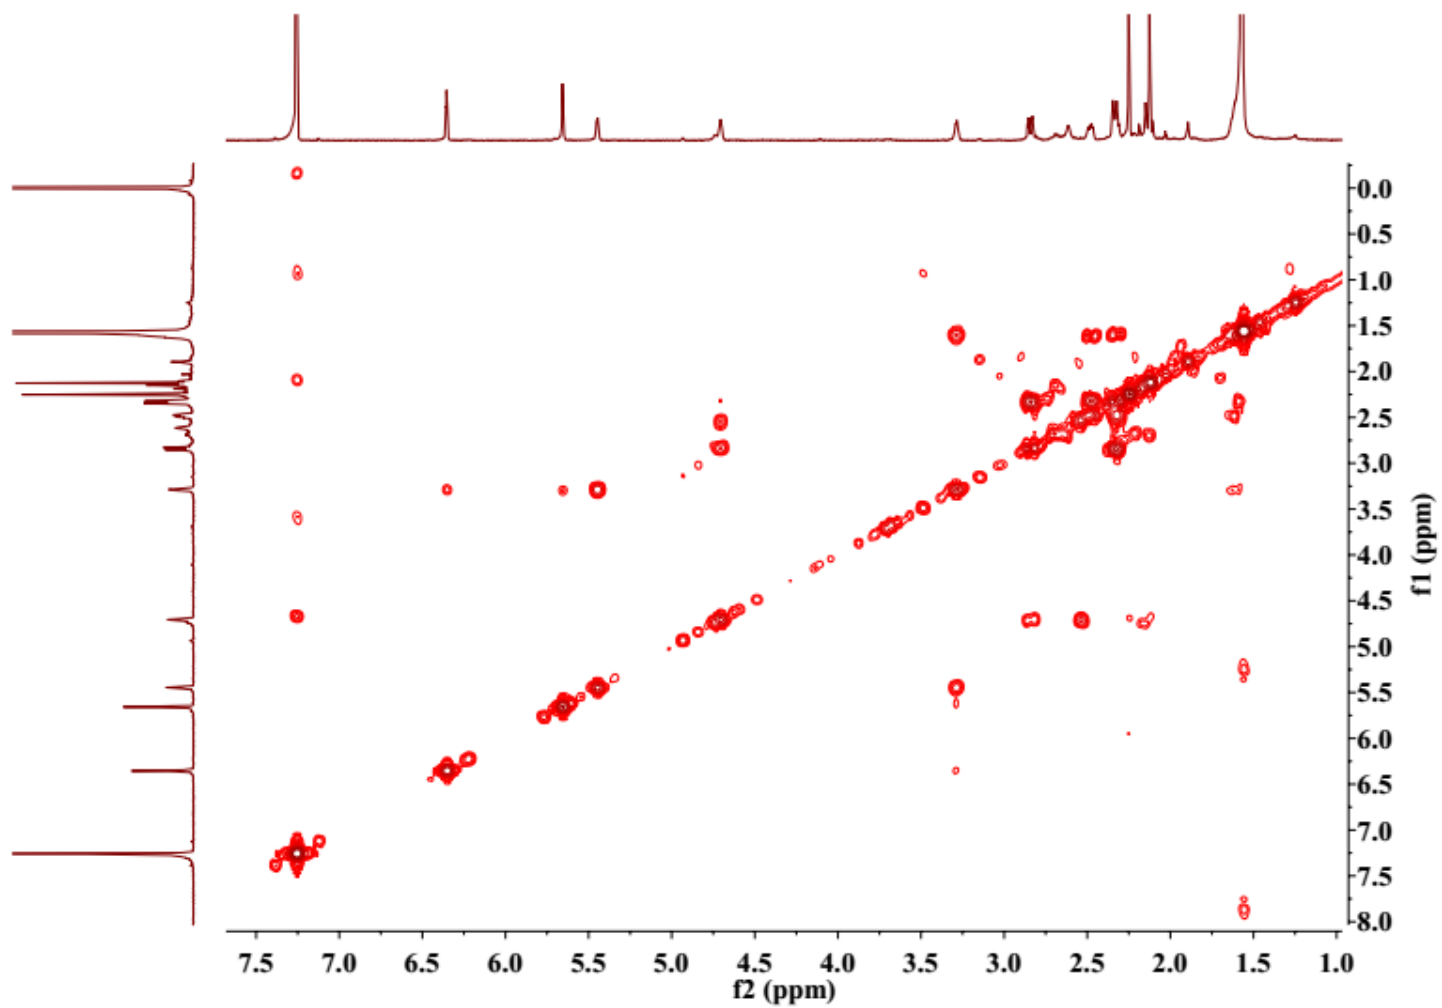

Figure S3  $^1\text{H}$ - $^1\text{H}$  COSY spectrum of compound **1** in  $\text{CDCl}_3$

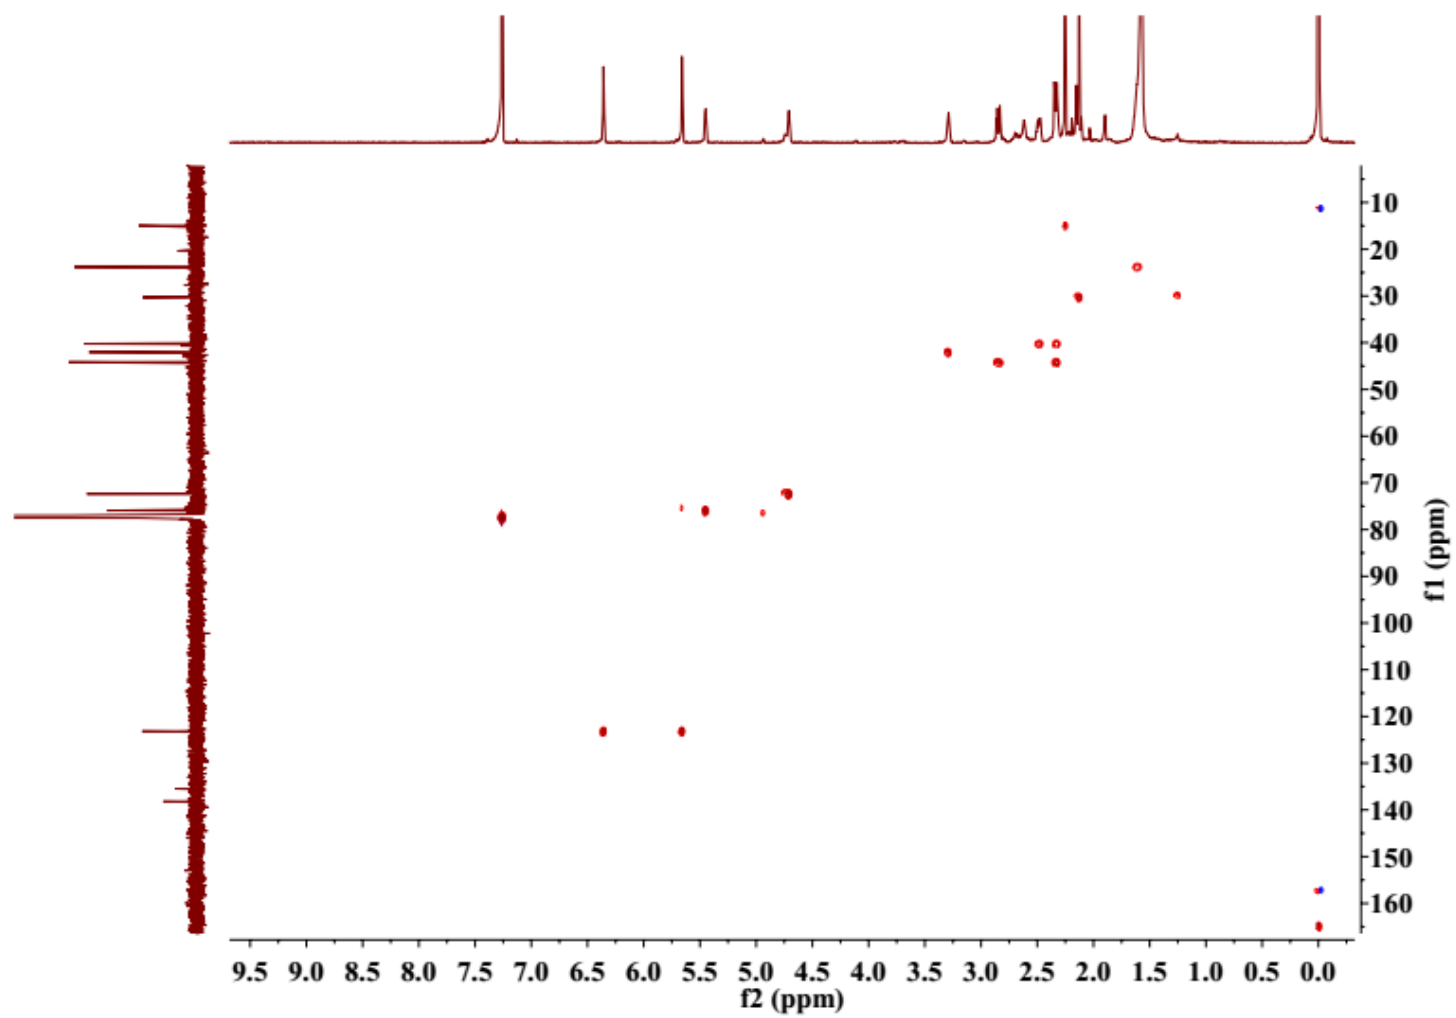

Figure S4 HSQC spectrum of compound **1** in CDCl<sub>3</sub>

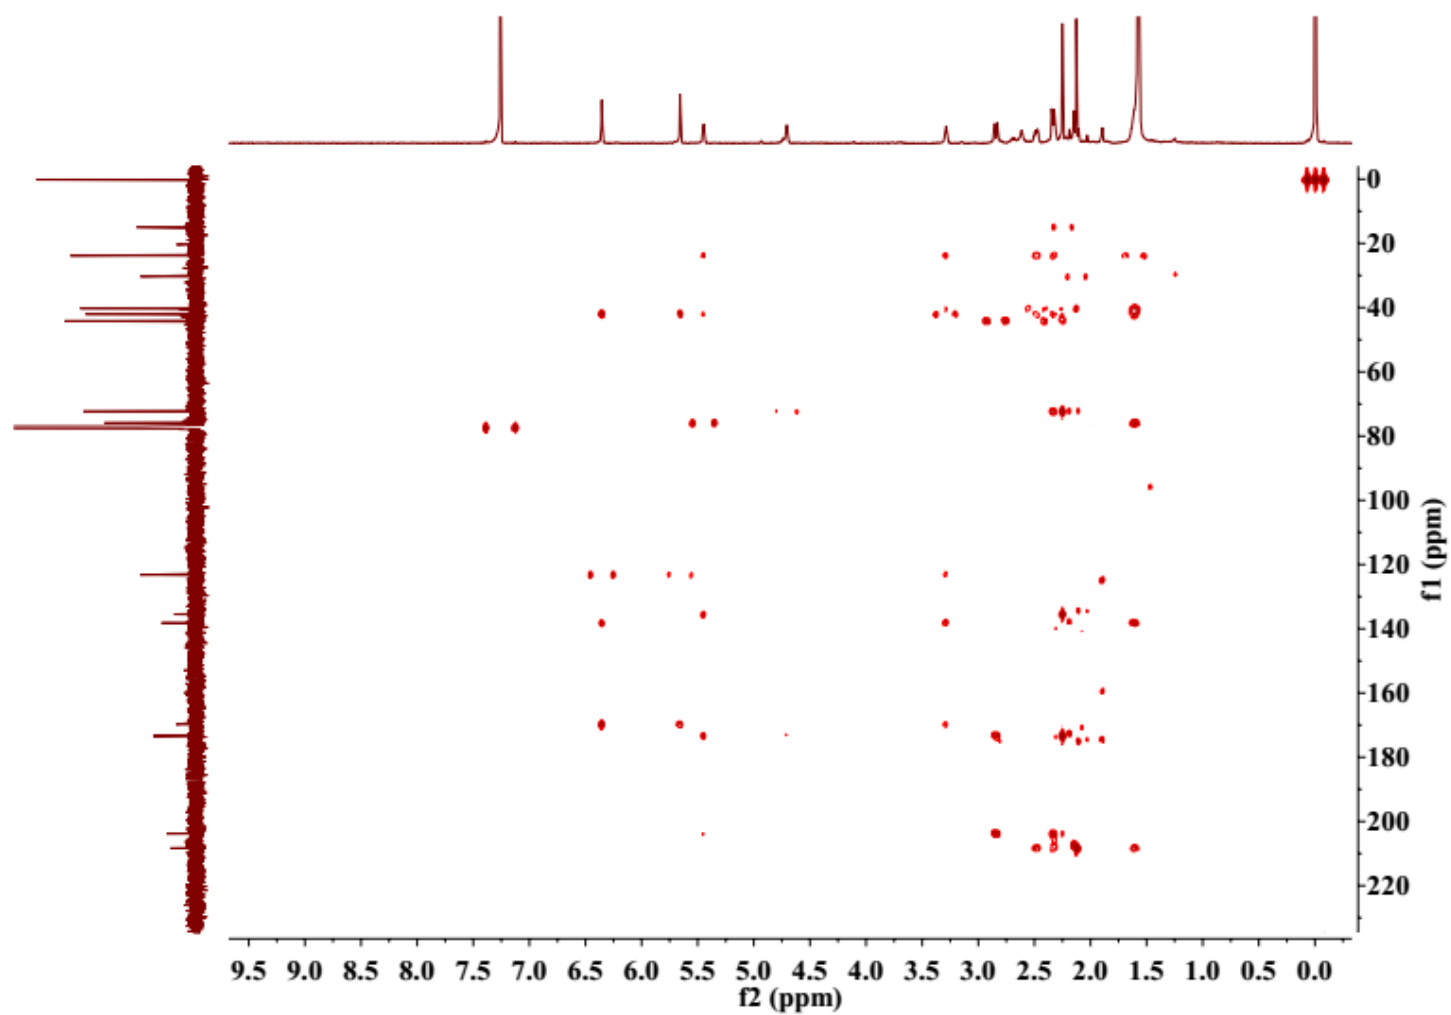

Figure S5 HMBC spectrum of compound 1 in CDCl<sub>3</sub>



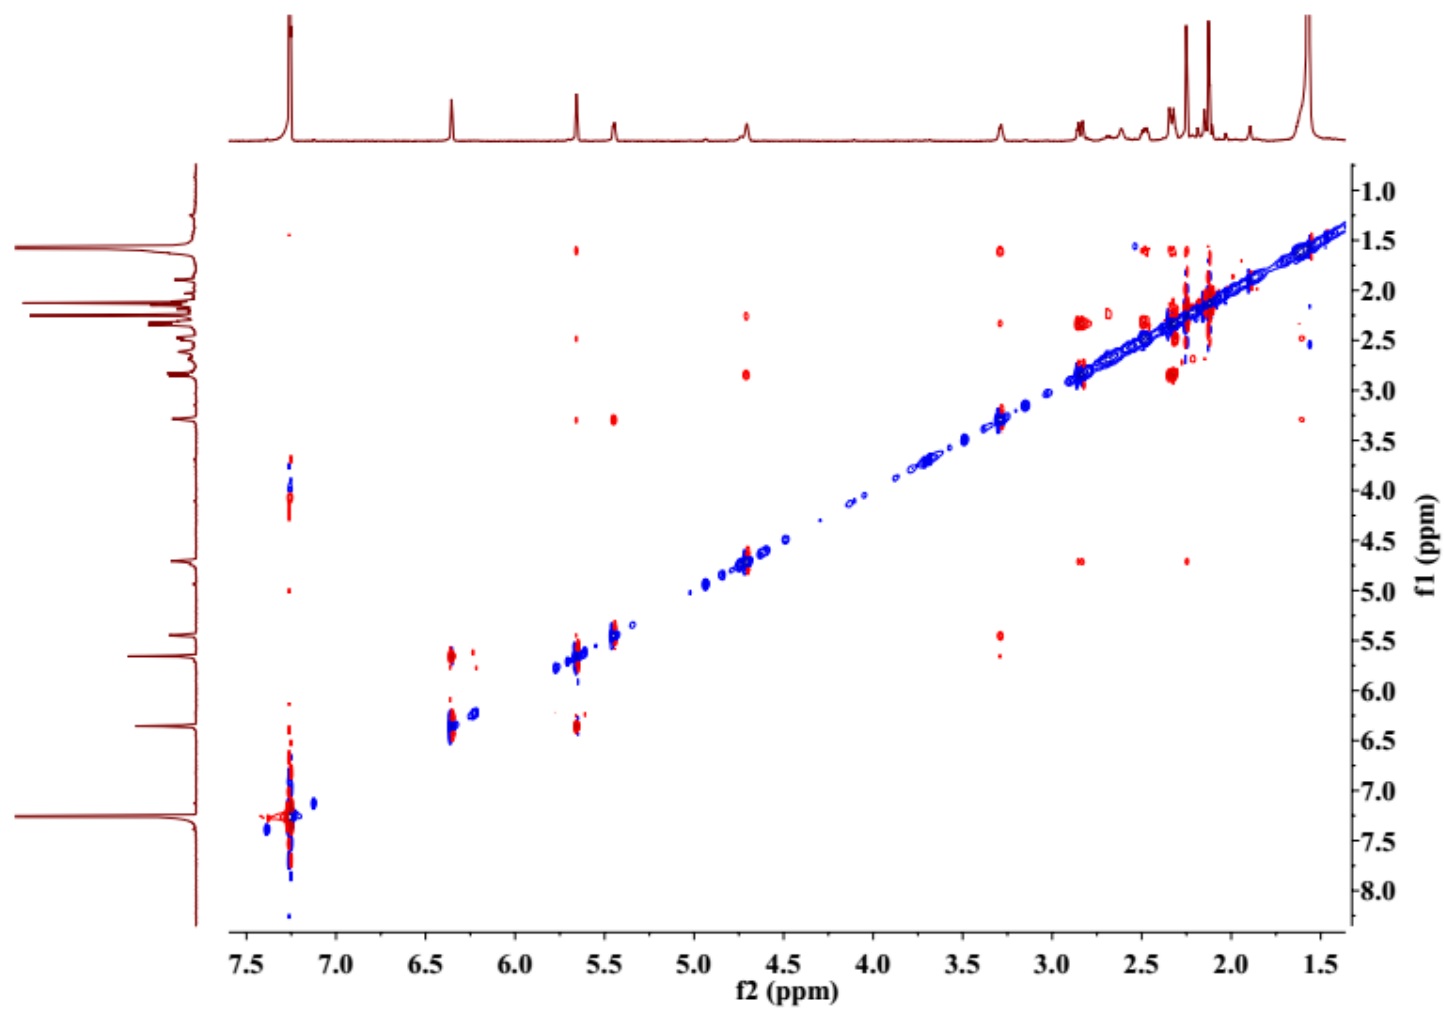

Figure S6 ROESY spectrum of compound **1** in CDCl<sub>3</sub>

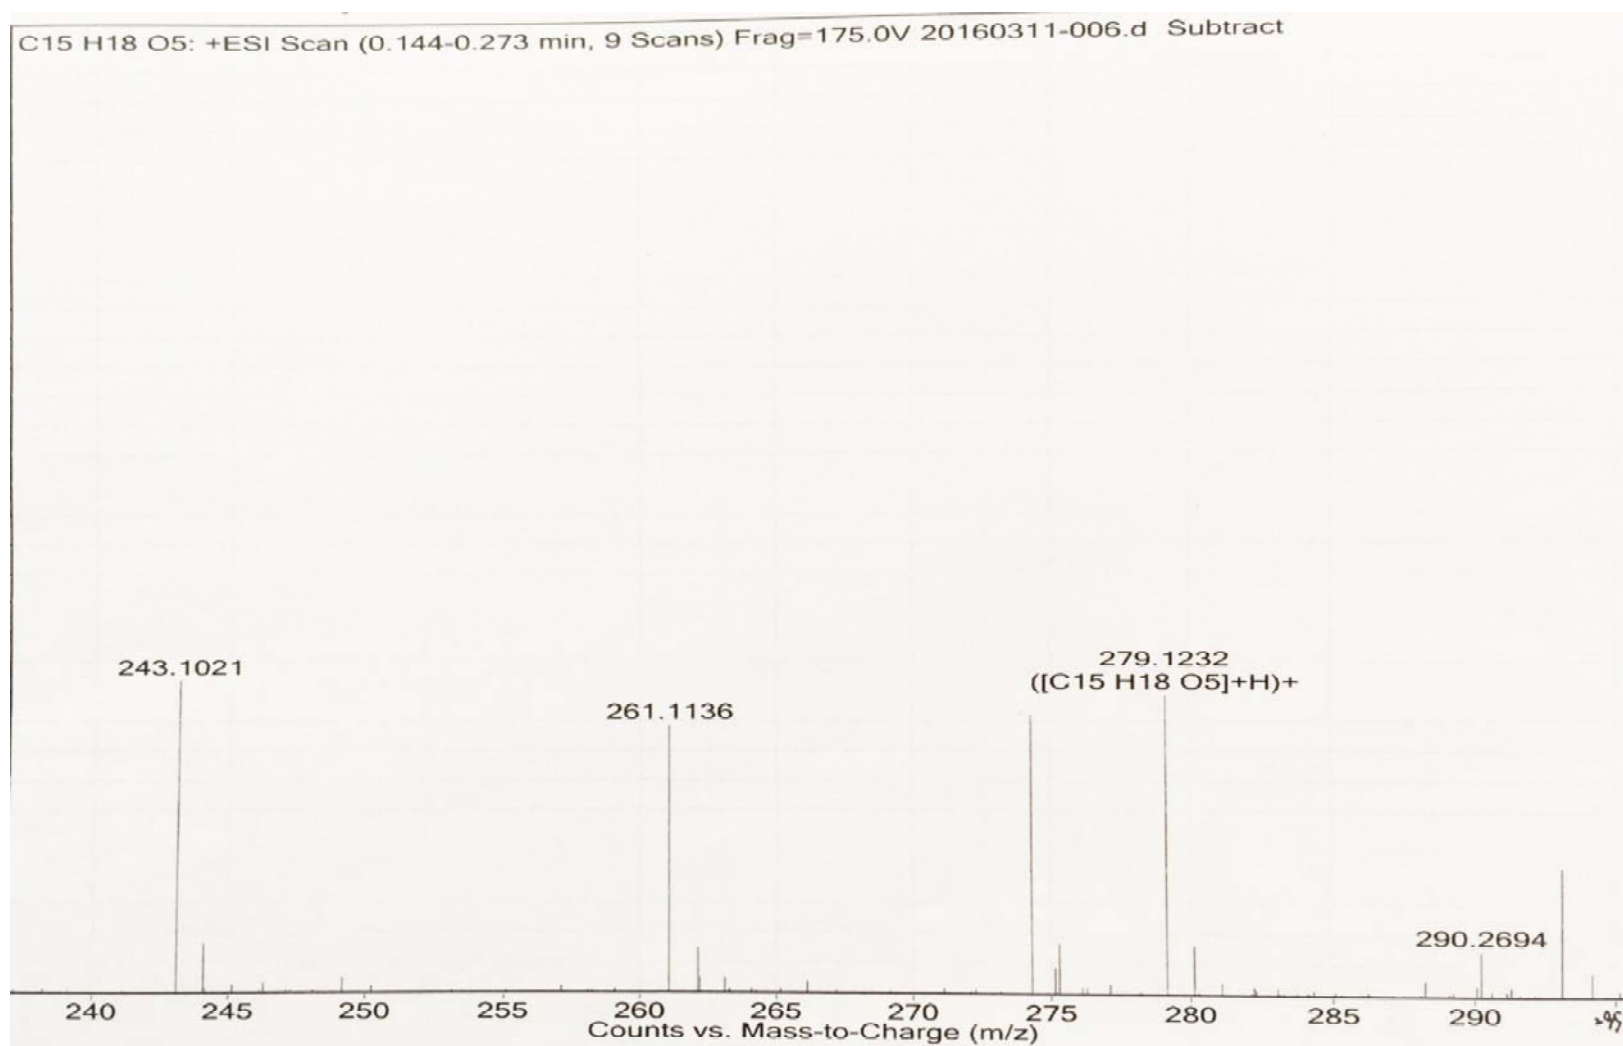

Figure S7 HRSEIMS spectrum of compound **1** in CH<sub>3</sub>OH
